# Supplementary material for: Social Determinants of Health Data Improve the Prediction of Cardiac Outcomes in Females with Breast Cancer
Source: Cancers (Basel). 2023 Sep 19;15(18):4630. doi: 10.3390/cancers15184630 (PMC10526347; doi:10.3390/cancers15184630)
Supplement: Supplementary file 1 [file cancers-15-04630-s001.zip › cancers-2559827-supplementary.pdf]

## Supplemental Material

### Title: Social Determinants of Health Data Improve the Prediction of Cardiac Outcomes in Females with Breast Cancer

**Supplemental Table S1.** ICD codes used to categorize cardiovascular history/risk factors and MACE. Medications names included on each medication category. Social determinants of health variables from LexisNexis and its domain categorization.

| Cardiovascular risk factors             | ICD9                                                                | ICD10                                                                       |
|-----------------------------------------|---------------------------------------------------------------------|-----------------------------------------------------------------------------|
| Cardiomyopathy                          | 425.XX                                                              | I42.XX                                                                      |
| Known Coronary Artery Disease           | 414.00, 414.01, 414.02, 414.03, 414.04, 414.05, 414.06, 414.07      | I25.10, I25.810, I25.811, I25.812                                           |
| Prior Myocardial Infarction             | 412.XX                                                              | I25.2                                                                       |
| Carotid Disease                         | 433.10                                                              | I65.29                                                                      |
| Prior TIA/Stroke                        | 438.XX                                                              | I69.9XX                                                                     |
| Chronic Kidney Disease                  | 585.XX                                                              | N18X                                                                        |
| Dyslipidemia                            | 272.X                                                               | E78X                                                                        |
| MACE                                    | ICD9                                                                | ICD10                                                                       |
| Heart Failure                           | 428.XX, 398.9, 402.XX, 401.XX, 414.8, 425.XX,785.51                 | I50.XX, I09.9, I11.0, I13.0, I13.2, I25.2, I42.0, I42.5-I42.9, I43.XX, R570 |
| Ischemic Stroke                         | 431.XX, 435.0X, 435.1X, 435.2X,                                     | I619, G45X, I63, I66, G834, G9781                                           |
|                                         | 435.3X, 435.8X, 435.9X, 433.01,                                     |                                                                             |
|                                         | 433.11, 433.21, 433.31, 433.81,                                     |                                                                             |
|                                         | 433.91, 434.01, 434.11, 434.91,                                     |                                                                             |
|                                         | 997.01, 344.60, 344.61                                              |                                                                             |
| Myocardial Infarction                   | 411.XX, 410.XX                                                      | I20.0, I21.X, I24.X                                                         |
| Atrial Fibrillation                     | 427.31                                                              | I48.91                                                                      |
| SDOH variable                           | Description                                                         |                                                                             |
| Domain 1: Social and Community Context  |                                                                     |                                                                             |
| Marital Status                          | Individual's inferred marital status                                |                                                                             |
| Number of household members             | Total count of household members who are on record                  |                                                                             |
| Number of elderly household members     | Total count of household members who are on record age 80 and older |                                                                             |
| Number of middle age household members  | Total count of household members who are on record age 40 to 64     |                                                                             |
| Number of young adult household members | Total count of household members who are on record age 20 to 39     |                                                                             |

|                                                      |                                                                                                                                                                                                                     |
|------------------------------------------------------|---------------------------------------------------------------------------------------------------------------------------------------------------------------------------------------------------------------------|
| Closest relatives distance                           | Distance in miles between identity and closest first degree relative or close associate                                                                                                                             |
| <b>Domain 2: Neighborhood and Built Environment</b>  |                                                                                                                                                                                                                     |
| Neighborhood burglary index                          | Current address neighborhood burglary index based on FBI data                                                                                                                                                       |
| Neighborhood car theft index                         | Current address neighborhood motor vehicle theft index based on FBI data                                                                                                                                            |
| Neighborhood crime index                             | Current address neighborhood total crime index based on FBI data                                                                                                                                                    |
| Neighborhood median household income                 | Current address neighborhood median household income based on US Census data                                                                                                                                        |
| Neighborhood murder index                            | Current address neighborhood murder index based on FBI data                                                                                                                                                         |
| Neighborhood median home value                       | Input address neighborhood median home values based on US Census data                                                                                                                                               |
| <b>Domain 3: Education Access and Quality</b>        |                                                                                                                                                                                                                     |
| Attended college                                     | Indicates that the individual is reported as having attended college                                                                                                                                                |
| Attending college                                    | Indicates that the individual is reported as currently attending college                                                                                                                                            |
| Education institution rating                         | Indicates the education program rating based on various institution statistics and national ratings                                                                                                                 |
| <b>Domain 4: Economic Stability</b>                  |                                                                                                                                                                                                                     |
| Annual income                                        | Identity's estimated annual income rounded to the nearest \$1000                                                                                                                                                    |
| Owns a property                                      | Indicates if identity is associated with ownership of any real property                                                                                                                                             |
| Wealth Index                                         | Wealth index based on relative value of real property and other assets recently reported                                                                                                                            |
| Number of properties owned                           | Number of properties identity currently owns                                                                                                                                                                        |
| Household income                                     | Estimated household income range, based on property value records and asset records that are associated with household members                                                                                      |
| Number of transportation properties in the household | Total count of personal property registrations (automobile, motorcycle, watercraft, or aircraft) that are currently registered to household members who are on record, based on personal property ownership records |
| Address stability index                              | Address stability index indicating how often identity has changed addresses                                                                                                                                         |
| Current residence status                             | Indicates if identity owns or rents at current address                                                                                                                                                              |
